# Supplementary material for: Major Publications in the Critical Care Pharmacotherapy Literature: 2023
Source: PubMed Central journal article supplement — Crit Care Explor. 2024 Oct 3;6(10):e1162. doi: 10.1097/CCE.0000000000001162 (PMC11452093; doi:10.1097/cce.0000000000001162), 2024-10-03
Supplement: cc9-6-e1162-s001.pdf [file cc9-6-e1162-s001.pdf]

## Supplemental Digital Content

|                                                      |   |
|------------------------------------------------------|---|
| Appendix 1: Search Terms and Filters.....            | 1 |
| Appendix 2: Articles included in Delphi process..... | 2 |
| eTable 1: Results of Delphi Survey Round 1.....      | 4 |
| eTable 2: Results of Delphi Survey Round 2.....      | 6 |
| eTable 3: Results of Delphi Survey Round 3.....      | 7 |

## Appendix 1

**Search terms:** (((critical care[MeSH Terms]) OR (intensive care[MeSH Terms])) OR (intensive care unit[MeSH Terms])) OR (critical illness[MeSH Terms]) OR (critically ill[MeSH Terms]).

**Filters:** Full text, Clinical Study, Clinical Trial, Clinical Trial, Phase I, Clinical Trial, Phase II, Clinical Trial, Phase III, Clinical Trial, Phase IV, Comparative Study, Controlled Clinical Trial, Pragmatic Clinical Trial, Randomized Controlled Trial, Validation Study.

## Appendix 2: Articles Included in the Delphi Process

Abbasi S, Sigari AA, Rostami S, et al.: Effect of enteral probiotics on prognostic scores and C-reactive protein levels in critically ill multiple trauma patients: a randomized, double-blind, placebo-controlled clinical trial. *Clin Nutr ESPEN* 2023; 55:30-37.

Andersen-Ranberg NC, Poulsen LM, Perner A, et al.: Haloperidol for the treatment of delirium in ICU patients. *N Engl J Med* 2022; 387:2425-2435.

Atmowihardjo LN, Schippers JR, Duijvelaar E, et al.: Efficacy and safety of intravenous imatinib in COVID-19 ARDS: a randomized, double-blind, placebo-controlled clinical trial. *Crit Care* 2023; 27:226.

Bardia A, Treggiari MM, Dai F, et al.: Efficacy and safety of sugammadex to shorten time-to-extubation following cardiac surgery: a single-center randomized placebo-controlled trial. *Crit Care Explor* 2022; 4:e0821.

Berger JS, Neal MD, Kornblith LZ, et al.: Effect of P2Y12 inhibitors on organ support-free survival in critically ill patients hospitalized for COVID-19: a randomized clinical trial. *JAMA Netw Open* 2023; 6:e2314428.

Bollaert PE, Monnier A, Schneider F, et al.: Fluid balance control in critically ill patients: results from POINCARE-2 stepped wedge cluster-randomized trial. *Crit Care* 2023; 27:66.

Bouzat P, Charbit J, Abback P, et al.: Efficacy and safety of early administration of 4-factor prothrombin complex concentrate in patients with trauma at risk of massive transfusion: the PROCOAG randomized clinical trial. *JAMA* 2023; 329:1367-1375.

Dequin PF, Meziani F, Quenot JP, et al.: Hydrocortisone in severe community-acquired pneumonia. *N Engl J Med* 2023; 388:1931-1941.

Ehrmann S, Barbier F, Demiselle J, et al.: Inhaled amikacin to prevent ventilator-associated pneumonia. *N Engl J Med* 2023; 389:2052-2062.

Gamarra-Morales Y, Herrera-Quintana L, Molina-Lopez J, et al.: Response to intravenous N-acetylcysteine supplementation in critically ill patients with COVID-19. *Nutrients* 2023; 15:2235.

Grillot N, Lebuffe G, Huet O, et al.: Effect of remifentanyl vs neuromuscular blockers during rapid sequence intubation on successful intubation without major complications among patients at risk of aspiration: a randomized clinical trial. *JAMA* 2023; 329:28-38.

Guidry CA, Beyene RT, Watson CM, et al.: Trial of antibiotic restraint in presumed pneumonia: a Surgical Infection Society multicenter pilot. *J Trauma Acute Care Surg* 2023; 94:232-240.

Gunst J, Debaveye Y, Guiza F, et al.: Tight blood-glucose control without early parenteral nutrition in the ICU. *N Engl J Med* 2023; 389:1180-1190.

Huang SS, Septimus EJ, Kleinman K, et al.: Nasal iodophor antiseptic vs nasal mupirocin antibiotic in the setting of chlorhexidine bathing to prevent infections in adult ICUs: a randomized clinical trial. *JAMA* 2023; 330:1337-1347.

Ibarra-Estrada M, Kattan E, Aguilar-Gonzalez P et al.: Early adjunctive methylene blue in patients with septic shock: a randomized controlled trial. *Crit Care* 2023; 27:110.

Inkinen N, Pettila V, Valkonen M, et al.: Non-interventional follow-up versus fluid bolus in RESPONSE to oliguria in hemodynamically stable critically ill patients: a randomized controlled pilot trial. *Crit Care* 2022; 26:401.

Jabaudon M, Genevrier A, Jaber S, et al.: Thoracic epidural analgesia in intensive care unit patients with acute pancreatitis: the EPIPAN multicenter randomized controlled trial. *Crit Care* 2023; 27:213.

Liu S, Wu Y, Qi S, et al.: Polymyxin B therapy based on therapeutic drug monitoring in carbapenem-resistant organisms sepsis: the PMB-CROS randomized clinical trial. *Crit Care* 2023; 27:232.

Liu Y, Peng Z, Liu S, et al.: Efficacy and safety of ciprofol sedation in ICU patients undergoing mechanical ventilation: a multicenter, single-blind, randomized, noninferiority trial. *Crit Care Med* 2023; 51:1318-1327.

Milling Jr TJ, Middeldorp S, Xu L, et al.: Final study report of andexanet alfa for major bleeding with factor Xa inhibitors. *Circulation* 2023; 147:1026-1038.

Mirjalili M, Zand F, Karimzadeh I, et al.: The clinical and paraclinical effectiveness of four-hour infusion vs. half-hour infusion of high-dose ampicillin-sulbactam in treatment of critically ill patients with sepsis or septic shock: An assessor-blinded randomized clinical trial. *J Crit Care* 2023;73:154170.

Monti G, Bradic N, Marzaroli M, et al.: Continuous vs intermittent meropenem administration in critically ill patients with sepsis: the MERCY randomized clinical trial. *JAMA* 2023; 330:141-151.

Moskowitz A, Berg KM, Grossestreuer AV et al.: Thiamine for renal protection in septic shock (TRPSS): a randomized, placebo-controlled trial. *Am J Respir Crit Care Med* 2023; 208:570-578.

NHLBI Prevention and Early Treatment of Acute Lung Injury Clinical Trials Network, Shapiro NI, Douglas IS, et al.: Early restrictive or liberal fluid management for sepsis-induced hypotension. *N Engl J Med* 2023; 388:499-510.

Nordness MF, Maiga AW, Wilson LD, et al.: Effect of propranolol and clonidine after severe traumatic brain injury: a pilot randomized clinical trial. *Crit Care* 2023; 27:228.

PATCH-TRAUMA Investigators and the ANZICS Clinical Trials Group, Gruen RL, Mitra B, et al.: Prehospital tranexamic acid for severe trauma. *N Engl J Med* 2023; 389:127-136.

Ramin S, Bringuier S, Martinez O, et al.: Continuous peripheral nerve blocks for analgesia of ventilated critically ill patients with multiple trauma: a prospective randomized study. *Anaesth Crit Care Pain Med* 2023; 42:101183.

Roquilly A, Francois B, Huet O, et al.: Interferon gamma-1b for the prevention of hospital-acquired pneumonia in critically ill patients: a phase 2, placebo-controlled randomized clinical trial. *Intensive Care Med* 2023; 49:530-544.

Sharshar T, Porcher R, Asfar P, et al.: Valproic acid as adjuvant treatment for convulsive status epilepticus: a randomised clinical trial. *Crit Care* 2023; 27:8.

Shepherd JM, Ross J, Anton L, et al.: Safety and efficacy of artesunate treatment in severely injured patients with traumatic hemorrhage. The TOP-ART randomized clinical trial. *Intensive Care Med* 2023; 49:922-933.

Smith L, Slooter AJC, Devlin JW, et al.: Efficacy of haloperidol to decrease the burden of delirium in adult critically ill patients: the EuRIDICE randomized clinical trial. *Crit Care* 2023; 27:413.

Soukup J, Michel P, Christel A, et al.: Prolonged sedation with sevoflurane in comparison to intravenous sedation in critically ill patients - A randomized controlled trial. *J Crit Care* 2023; 74:154251.

SuDDICU Investigators for the Australian and New Zealand Intensive Care Society Clinical Trials Group, Myburgh JA, Seppelt IM, et al.: Effect of selective decontamination of the digestive tract on hospital mortality in critically ill patients receiving mechanical ventilation: a randomized clinical trial. *JAMA* 2022; 328:1911-1921.

Sun T, Zhang N, Cui N, et al.: Efficacy of levosimendan in the treatment of patients with severe septic cardiomyopathy. *J Cardiovasc Vasc Anesthes* 2023; 37:344-349.

Tadie JM, Locher C, Maamar A, et al.: Enteral citrulline supplementation versus placebo on SOFA score on day 7 in mechanically ventilated critically ill patients: the IMMUNOCITRE randomized clinical trial. *Crit Care* 2023; 27:381.

Vlaar APJ, Witzernath M, van Paassen P, et al.: Anti-C5a antibody (vilobelimab) therapy for critically ill, invasively mechanically ventilated patients with COVID-19 (PANAMO): a multicentre, double-blind, randomised, placebo-controlled, phase 3 trial. *Lancet Respir Med* 2022; 10:1137-1146.

Whitehouse T, Hossain A, Perkins GD, et al.: Landiolol and organ failure in patients with septic shock: The STRESS-L randomized clinical trial. *JAMA* 2023; 330:1641-1652.

Zhang K, Zhang H, Zhao C, et al.: The furosemide stress test predicts the timing of continuous renal replacement therapy initiation in critically ill patients with acute kidney injury: a double-blind prospective intervention cohort study. *Eur J Med Res* 2023; 28:149.

**eTable 1: Results of Round 1 Delphi Survey**

| Trial                                                                                                                                                                                                                                                                                                                                              | Score |
|----------------------------------------------------------------------------------------------------------------------------------------------------------------------------------------------------------------------------------------------------------------------------------------------------------------------------------------------------|-------|
| Dequin PF, Meziani F, Quenot JP, et al.: Hydrocortisone in severe community-acquired pneumonia. <i>N Engl J Med</i> 2023; 388:1931-1941.                                                                                                                                                                                                           | 4.67  |
| Milling Jr TJ, Middeldorp S, Xu L, et al.: Final study report of andexanet alfa for major bleeding with factor Xa inhibitors. <i>Circulation</i> 2023; 147:1026-1038.                                                                                                                                                                              | 4.38  |
| Bouzat P, Charbit J, Abback P, et al.: Efficacy and safety of early administration of 4-factor prothrombin complex concentrate in patients with trauma at risk of massive transfusion: the PROCOAG randomized clinical trial. <i>JAMA</i> 2023; 329:1367-1375.                                                                                     | 4.19  |
| NHLBI Prevention and Early Treatment of Acute Lung Injury Clinical Trials Network, Shapiro NI, Douglas IS, et al.: Early restrictive or liberal fluid management for sepsis-induced hypotension. <i>N Engl J Med</i> 2023; 388:499-510.                                                                                                            | 4.13  |
| Ibarra-Estrada M, Kattan E, Aguilar-Gonzalez P et al.: Early adjunctive methylene blue in patients with septic shock: a randomized controlled trial. <i>Crit Care</i> 2023; 27:110.                                                                                                                                                                | 4.00  |
| Ehrmann S, Barbier F, Demiselle J, et al.: Inhaled amikacin to prevent ventilator-associated pneumonia. <i>N Engl J Med</i> 2023; 389:2052-2062.                                                                                                                                                                                                   | 4.00  |
| PATCH-TRAUMA Investigators and the ANZICS Clinical Trials Group, Gruen RL, Mitra B, et al.: Prehospital tranexamic acid for severe trauma. <i>N Engl J Med</i> 2023; 389:127-136.                                                                                                                                                                  | 3.81  |
| Soukup J, Michel P, Christel A, et al.: Prolonged sedation with sevoflurane in comparison to intravenous sedation in critically ill patients - A randomized controlled trial. <i>J Crit Care</i> 2023; 74:154251.                                                                                                                                  | 3.69  |
| Monti G, Bradic N, Marzaroli M, et al.: Continuous vs intermittent meropenem administration in critically ill patients with sepsis: the MERCY randomized clinical trial. <i>JAMA</i> 2023; 330:141-151.                                                                                                                                            | 3.67  |
| Zhang K, Zhang H, Zhao C, et al.: The furosemide stress test predicts the timing of continuous renal replacement therapy initiation in critically ill patients with acute kidney injury: a double-blind prospective intervention cohort study. <i>Eur J Med Res</i> 2023; 28:149.                                                                  | 3.53  |
| Vlaar APJ, Witzernath M, van Paassen P, et al.: Anti-C5a antibody (vilobelimab) therapy for critically ill, invasively mechanically ventilated patients with COVID-19 (PANAMO): a multicentre, double-blind, randomised, placebo-controlled, phase 3 trial. <i>Lancet Respir Med</i> 2022; 10:1137-1146.                                           | 3.53  |
| Huang SS, Septimus EJ, Kleinman K, et al.: Nasal iodophor antiseptic vs nasal mupirocin antibiotic in the setting of chlorhexidine bathing to prevent infections in adult ICUs: a randomized clinical trial. <i>JAMA</i> 2023; 330:1337-1347.                                                                                                      | 3.53  |
| Guidry CA, Beyene RT, Watson CM, et al.: Trial of antibiotic restraint in presumed pneumonia: a Surgical Infection Society multicenter pilot. <i>J Trauma Acute Care Surg</i> 2023; 94:232-240.                                                                                                                                                    | 3.53  |
| Liu S, Wu Y, Qi S, et al.: Polymyxin B therapy based on therapeutic drug monitoring in carbapenem-resistant organisms sepsis: the PMB-CROS randomized clinical trial. <i>Crit Care</i> 2023; 27:232.                                                                                                                                               | 3.47  |
| SuDDICU Investigators for the Australian and New Zealand Intensive Care Society Clinical Trials Group, Myburgh JA, Seppelt IM, et al.: Effect of selective decontamination of the digestive tract on hospital mortality in critically ill patients receiving mechanical ventilation: a randomized clinical trial. <i>JAMA</i> 2022; 328:1911-1921. | 3.40  |
| Andersen-Ranberg NC, Poulsen LM, Perner A, et al.: Haloperidol for the treatment of delirium in ICU patients. <i>N Engl J Med</i> 2022; 387:2425-2435.                                                                                                                                                                                             | 3.19  |
| Bardia A, Treggiari MM, Dai F, et al.: Efficacy and safety of sugammadex to shorten time-to-extubation following cardiac surgery: a single-center randomized placebo-controlled trial. <i>Crit Care Explor</i> 2022; 4:e0821.                                                                                                                      | 3.13  |
| Gunst J, Debaveye Y, Guiza F, et al.: Tight blood-glucose control without early parenteral nutrition in the ICU. <i>N Engl J Med</i> 2023; 389:1180-1190.                                                                                                                                                                                          | 3.13  |
| Moskowitz A, Berg KM, Grossestreuer AV et al.: Thiamine for renal protection in septic shock (TRPSS): a randomized, placebo-controlled trial. <i>Am J Respir Crit Care Med</i> 2023; 208:570-578.                                                                                                                                                  | 3.13* |
| Grillot N, Lebuffe G, Huet O, et al.: Effect of remifentanyl vs neuromuscular blockers during rapid sequence intubation on successful intubation without major complications among patients at risk of aspiration: a randomized clinical trial. <i>JAMA</i> 2023; 329:28-38.                                                                       | 3.07  |
| Gamarra-Morales Y, Herrera-Quintana L, Molina-Lopez J, et al.: Response to intravenous N-acetylcysteine supplementation in critically ill patients with COVID-19. <i>Nutrients</i> 2023; 15:2235.                                                                                                                                                  | 3.00  |
| Inkinen N, Pettila V, Valkonen M, et al.: Non-interventional follow-up versus fluid bolus in RESPONSE to oliguria in hemodynamically stable critically ill patients: a randomized controlled pilot trial. <i>Crit Care</i> 2022; 26:401.                                                                                                           | 3.00  |
| Liu Y, Peng Z, Liu S, et al.: Efficacy and safety of ciprofol sedation in ICU patients undergoing mechanical ventilation: a multicenter, single-blind, randomized, noninferiority trial. <i>Crit Care Med</i> 2023; 51:1318-1327.                                                                                                                  | 3.00  |
| Sun T, Zhang N, Cui N, et al.: Efficacy of levosimendan in the treatment of patients with severe septic cardiomyopathy. <i>J Cardiovasc Vasc Anesth</i> 2023; 37:344-349.                                                                                                                                                                          | 3.00  |
| Bollaert PE, Monnier A, Schneider F, et al.: Fluid balance control in critically ill patients: results from POINCARE-2 stepped wedge cluster-randomized trial. <i>Crit Care</i> 2023; 27:66.                                                                                                                                                       | 2.94  |

**eTable 1: Results of Round 1 Delphi Survey (continued)**

|                                                                                                                                                                                                                                                                                                                              |      |
|------------------------------------------------------------------------------------------------------------------------------------------------------------------------------------------------------------------------------------------------------------------------------------------------------------------------------|------|
| Smith L, Slooter AJC, Devlin JW, et al.: Efficacy of haloperidol to decrease the burden of delirium in adult critically ill patients: the EuRIDICE randomized clinical trial. <i>Crit Care</i> 2023; 27:413                                                                                                                  | 2.94 |
| Whitehouse T, Hossain A, Perkins GD, et al.: Landiolol and organ failure in patients with septic shock: The STRESS-L randomized clinical trial. <i>JAMA</i> 2023; 330:1641-1652.                                                                                                                                             | 2.94 |
| Sharshar T, Porcher R, Asfar P, et al.: Valproic acid as adjuvant treatment for convulsive status epilepticus: a randomised clinical trial. <i>Crit Care</i> 2023; 27:8.                                                                                                                                                     | 2.87 |
| Mirjalili M, Zand F, Karimzadeh I, et al.: The clinical and paraclinical effectiveness of four-hour infusion vs. half-hour infusion of high-dose ampicillin-sulbactam in treatment of critically ill patients with sepsis or septic shock: An assessor-blinded randomized clinical trial. <i>J Crit Care</i> 2023;73:154170. | 2.87 |
| Ramin S, Bringuier S, Martinez O, et al.: Continuous peripheral nerve blocks for analgesia of ventilated critically ill patients with multiple trauma: a prospective randomized study. <i>Anaesth Crit Care Pain Med</i> 2023; 42:101183.                                                                                    | 2.75 |
| Berger JS, Neal MD, Kornblith LZ, et al.: Effect of P2Y12 inhibitors on organ support-free survival in critically ill patients hospitalized for COVID-19: a randomized clinical trial. <i>JAMA Netw Open</i> 2023; 6:e2314428.                                                                                               | 2.69 |
| Nordness MF, Maiga AW, Wilson LD, et al.: Effect of propranolol and clonidine after severe traumatic brain injury: a pilot randomized clinical trial. <i>Crit Care</i> 2023; 27:228.                                                                                                                                         | 2.67 |
| Atmowihardjo LN, Schippers JR, Duijvelaar E, et al.: Efficacy and safety of intravenous imatinib in COVID-19 ARDS: a randomized, double-blind, placebo-controlled clinical trial. <i>Crit Care</i> 2023; 27:226.                                                                                                             | 2.60 |
| Jabaudon M, Genevrier A, Jaber S, et al.: Thoracic epidural analgesia in intensive care unit patients with acute pancreatitis: the EPIPAN multicenter randomized controlled trial. <i>Crit Care</i> 2023; 27:213.                                                                                                            | 2.50 |
| Shepherd JM, Ross J, Anton L, et al.: Safety and efficacy of artesunate treatment in severely injured patients with traumatic hemorrhage. The TOP-ART randomized clinical trial. <i>Intensive Care Med</i> 2023; 49:922-933.                                                                                                 | 2.44 |
| Roquilly A, Francois B, Huet O, et al.: Interferon gamma-1b for the prevention of hospital-acquired pneumonia in critically ill patients: a phase 2, placebo-controlled randomized clinical trial. <i>Intensive Care Med</i> 2023; 49:530-544.                                                                               | 2.33 |
| Tadie JM, Locher C, Maamar A, et al.: Enteral citrulline supplementation versus placebo on SOFA score on day 7 in mechanically ventilated critically ill patients: the IMMUNOCITRE randomized clinical trial. <i>Crit Care</i> 2023; 27:381.                                                                                 | 2.27 |
| Abbasi S, Sigari AA, Rostami S, et al.: Effect of enteral probiotics on prognostic scores and C-reactive protein levels in critically ill multiple trauma patients: a randomized, double-blind, placebo-controlled clinical trial. <i>Clin Nutr ESPEN</i> 2023; 55:30-37                                                     | 2.13 |

\* Articles scoring at or above this threshold were selected for Round 2 of the Delphi survey

**eTable 2: Results of Round 2 Delphi Survey**

| Trial                                                                                                                                                                                                                                                                                                                                              | Score |
|----------------------------------------------------------------------------------------------------------------------------------------------------------------------------------------------------------------------------------------------------------------------------------------------------------------------------------------------------|-------|
| Dequin PF, Meziani F, Quenot JP, et al.: Hydrocortisone in severe community-acquired pneumonia. <i>N Engl J Med</i> 2023; 388:1931-1941.                                                                                                                                                                                                           | 4.64  |
| Milling Jr TJ, Middeldorp S, Xu L, et al.: Final study report of andexanet alfa for major bleeding with factor Xa inhibitors. <i>Circulation</i> 2023; 147:1026-1038.                                                                                                                                                                              | 4.29  |
| Ehrmann S, Barbier F, Demiselle J, et al.: Inhaled amikacin to prevent ventilator-associated pneumonia. <i>N Engl J Med</i> 2023; 389:2052-2062.                                                                                                                                                                                                   | 4.21  |
| NHLBI Prevention and Early Treatment of Acute Lung Injury Clinical Trials Network, Shapiro NI, Douglas IS, et al.: Early restrictive or liberal fluid management for sepsis-induced hypotension. <i>N Engl J Med</i> 2023; 388:499-510.                                                                                                            | 3.93  |
| Bouzat P, Charbit J, Abback P, et al.: Efficacy and safety of early administration of 4-factor prothrombin complex concentrate in patients with trauma at risk of massive transfusion: the PROCOAG randomized clinical trial. <i>JAMA</i> 2023; 329:1367-1375.                                                                                     | 3.86  |
| Ibarra-Estrada M, Kattan E, Aguilar-Gonzalez P et al.: Early adjunctive methylene blue in patients with septic shock: a randomized controlled trial. <i>Crit Care</i> 2023; 27:110.                                                                                                                                                                | 3.86  |
| PATCH-TRAUMA Investigators and the ANZICS Clinical Trials Group, Gruen RL, Mitra B, et al.: Prehospital tranexamic acid for severe trauma. <i>N Engl J Med</i> 2023; 389:127-136.                                                                                                                                                                  | 3.64  |
| Soukup J, Michel P, Christel A, et al.: Prolonged sedation with sevoflurane in comparison to intravenous sedation in critically ill patients - A randomized controlled trial. <i>J Crit Care</i> 2023; 74:154251.                                                                                                                                  | 3.57  |
| Vlaar APJ, Witzenzath M, van Paassen P, et al.: Anti-C5a antibody (vilobelimab) therapy for critically ill, invasively mechanically ventilated patients with COVID-19 (PANAMO): a multicentre, double-blind, randomised, placebo-controlled, phase 3 trial. <i>Lancet Respir Med</i> 2022; 10:1137-1146.                                           | 3.50  |
| Guidry CA, Beyene RT, Watson CM, et al.: Trial of antibiotic restraint in presumed pneumonia: a Surgical Infection Society multicenter pilot. <i>J Trauma Acute Care Surg</i> 2023; 94:232-240.                                                                                                                                                    | 3.43* |
| Andersen-Ranberg NC, Poulsen LM, Perner A, et al.: Haloperidol for the treatment of delirium in ICU patients. <i>N Engl J Med</i> 2022; 387:2425-2435.                                                                                                                                                                                             | 3.36  |
| Monti G, Bradic N, Marzaroli M, et al.: Continuous vs intermittent meropenem administration in critically ill patients with sepsis: the MERCY randomized clinical trial. <i>JAMA</i> 2023; 330:141-151.                                                                                                                                            | 3.36  |
| Zhang K, Zhang H, Zhao C, et al.: The furosemide stress test predicts the timing of continuous renal replacement therapy initiation in critically ill patients with acute kidney injury: a double-blind prospective intervention cohort study. <i>Eur J Med Res</i> 2023; 28:149.                                                                  | 3.14  |
| Liu S, Wu Y, Qi S, et al.: Polymyxin B therapy based on therapeutic drug monitoring in carbapenem-resistant organisms sepsis: the PMB-CROS randomized clinical trial. <i>Crit Care</i> 2023; 27:232.                                                                                                                                               | 3.00  |
| Gunst J, Debaveye Y, Guiza F, et al.: Tight blood-glucose control without early parenteral nutrition in the ICU. <i>N Engl J Med</i> 2023; 389:1180-1190.                                                                                                                                                                                          | 2.79  |
| Huang SS, Septimus EJ, Kleinman K, et al.: Nasal iodophor antiseptic vs nasal mupirocin antibiotic in the setting of chlorhexidine bathing to prevent infections in adult ICUs: a randomized clinical trial. <i>JAMA</i> 2023; 330:1337-1347.                                                                                                      | 2.79  |
| SuDDICU Investigators for the Australian and New Zealand Intensive Care Society Clinical Trials Group, Myburgh JA, Seppelt IM, et al.: Effect of selective decontamination of the digestive tract on hospital mortality in critically ill patients receiving mechanical ventilation: a randomized clinical trial. <i>JAMA</i> 2022; 328:1911-1921. | 2.79  |
| Bardia A, Treggiari MM, Dai F, et al.: Efficacy and safety of sugammadex to shorten time-to-extubation following cardiac surgery: a single-center randomized placebo-controlled trial. <i>Crit Care Explor</i> 2022; 4:e0821.                                                                                                                      | 2.71  |
| Moskowitz A, Berg KM, Grossestreuer AV et al.: Thiamine for renal protection in septic shock (TRPSS): a randomized, placebo-controlled trial. <i>Am J Respir Crit Care Med</i> 2023; 208:570-578.                                                                                                                                                  | 2.64  |

\* Articles scoring at or above this threshold were selected for Round 3 of the Delphi survey

**eTable 3: Results of Round 3 Delphi Survey**

| Trial                                                                                                                                                                                                                                                                                                    | Mean Rank |
|----------------------------------------------------------------------------------------------------------------------------------------------------------------------------------------------------------------------------------------------------------------------------------------------------------|-----------|
| Dequin PF, Meziani F, Quenot JP, et al.: Hydrocortisone in severe community-acquired pneumonia. <i>N Engl J Med</i> 2023; 388:1931-1941.                                                                                                                                                                 | 2.2       |
| NHLBI Prevention and Early Treatment of Acute Lung Injury Clinical Trials Network, Shapiro NI, Douglas IS, et al.: Early restrictive or liberal fluid management for sepsis-induced hypotension. <i>N Engl J Med</i> 2023; 388:499-510.                                                                  | 3.5       |
| Ehrmann S, Barbier F, Demiselle J, et al.: Inhaled amikacin to prevent ventilator-associated pneumonia. <i>N Engl J Med</i> 2023; 389:2052-2062.                                                                                                                                                         | 4.2       |
| Milling Jr TJ, Middeldorp S, Xu L, et al.: Final study report of andexanet alfa for major bleeding with factor Xa inhibitors. <i>Circulation</i> 2023; 147:1026-1038.                                                                                                                                    | 4.4       |
| Ibarra-Estrada M, Kattan E, Aguilar-Gonzalez P et al.: Early adjunctive methylene blue in patients with septic shock: a randomized controlled trial. <i>Crit Care</i> 2023; 27:110.                                                                                                                      | 6.9       |
| Bouzat P, Charbit J, Abback P, et al.: Efficacy and safety of early administration of 4-factor prothrombin complex concentrate in patients with trauma at risk of massive transfusion: the PROCOAG randomized clinical trial. <i>JAMA</i> 2023; 329:1367-1375.                                           | 7.2*      |
| Vlaar APJ, Witzernath M, van Paassen P, et al.: Anti-C5a antibody (vilobelimab) therapy for critically ill, invasively mechanically ventilated patients with COVID-19 (PANAMO): a multicentre, double-blind, randomised, placebo-controlled, phase 3 trial. <i>Lancet Respir Med</i> 2022; 10:1137-1146. | 7.4       |
| Guidry CA, Beyene RT, Watson CM, et al.: Trial of antibiotic restraint in presumed pneumonia: a Surgical Infection Society multicenter pilot. <i>J Trauma Acute Care Surg</i> 2023; 94:232-240.                                                                                                          | 7.4       |
| PATCH-TRAUMA Investigators and the ANZICS Clinical Trials Group, Gruen RL, Mitra B, et al.: Prehospital tranexamic acid for severe trauma. <i>N Engl J Med</i> 2023; 389:127-136.                                                                                                                        | 7.8       |
| Soukup J, Michel P, Christel A, et al.: Prolonged sedation with sevoflurane in comparison to intravenous sedation in critically ill patients - A randomized controlled trial. <i>J Crit Care</i> 2023; 74:154251.                                                                                        | 8.1       |

\* Articles with a mean rank at or below this threshold were selected for inclusion in the final review process
